# Supplementary material
Source: PubMed Central journal article supplement (PMC6858927)
Supplement: NIHMS1040334-supplement-1.pdf [file NIHMS1040334-supplement-1.pdf]

Supplementary material to:

**Preclinical activity and a pilot phase I study of pacritinib, an oral JAK2/FLT3 inhibitor, and chemotherapy in *FLT3*-ITD-positive AML**

Jae Yoon Jeon<sup>1</sup>, Qihong Zhao<sup>2,3</sup>, Daelynn R. Buelow<sup>1</sup>, Mitch Phelps<sup>1,3</sup>, Alison R. Walker<sup>2,3</sup>, Alice S. Mims<sup>2,3</sup>, Sumithira Vasu<sup>2,3</sup>, Gregory Behbehani<sup>2,3</sup>, James Blachly<sup>2,3</sup>, William Blum<sup>4</sup>, Rebecca B. Klisovic<sup>4</sup>, John C. Byrd<sup>2,3</sup>, Ramiro Garzon<sup>2,3</sup>, Sharyn D. Baker<sup>1,2,3</sup> and Bhavana Bhatnagar<sup>2,3</sup>

<sup>1</sup>Division of Pharmaceutics and Pharmaceutical Chemistry, College of Pharmacy; <sup>2</sup>Division of Hematology, Department of Internal Medicine; <sup>3</sup>Comprehensive Cancer Center, Columbus OH; <sup>4</sup>Department of Hematology and Medical Oncology, Emory University School of Medicine, Winship Cancer Institute

**Methods**

Exclusion criteria

Patients receiving any other investigational agents or that have received other investigational agents within 14 days of enrollment; patients with significantly decreased or obstructed gastrointestinal tract; patients with serious medical psychiatric illness that could interfere with participation; patients who had chemotherapy or radiotherapy or major surgery within 2 weeks prior to entering the study; patients with active central nervous system malignancy; patients with a history of platelet alloimmunization; patients with other malignancy within the last 3 years, other than curatively treated basal cell or squamous cell skin cancer, carcinoma in situ of the cervix, organ confined or treated nonmetastatic prostate cancer with negative prostate-specific antigen, in situ breast carcinoma after complete surgical resection, or superficial transitional cell bladder carcinoma; patients who are not able to swallow capsules or tablets; known active HIV or hepatitis A, B, or C virus infection

Deep amplicon sequencing

Briefly, FLT3 exon 17 was amplified from gDNA using forward primer 5'-TGAACGCAACAGCTTATGGA3' and reverse primer 5'-CCATGAAGCCCTGAGATT TG -3'. FLT3 exon 20 was amplified using forward primer 5'- TTCCATCACCGGTACCTCCTA -3' and reverse primer 5'-

CCTGAAGCTGCAGAAAAACC -3'. PCR amplicons were cleaned up using QIAquick PCR Purification Kit (Qiagen) and DNA concentrations were determined using an Invitrogen Qubit 3 Fluorometer and Qubit dsDNA BR Assay Kit. 0.1 ng input DNA from each exon was fragmented, tagged with adapters, and libraries were prepared using the Nextera XT DNA Sample Preparation Kit following the manufacturer's instructions (Illumina). Libraries were normalized and pooled using manufacturer's protocol then sequenced on an Illumina MiSeq System (Illumina) with 150bp paired-end reads. Image analyses and base calling were conducted using MiSeq Control Software versions 1.5.15.1 or 2.2 and Real Time Analysis versions 1.13.148 or 1.17.28. After removing the adapter sequences, high-quality reads (Phred-like score Q30 or greater) with at least 50 nucleotides were aligned to human *FLT3* reference sequence (UCSC hg19). Using CLC Genomics Workbench v11 (CLCBio) Mutations were detected and the frequencies of mutation were determined using Integrative genomics (IVG; Broad Institute). The minimum frequency of mutation detection at each genomic location was set with a threshold at the upper limit of the 99.9% confidence interval from the maximum sequencing error rate representing the platform sensitivities for detecting the low frequency allele with corresponding substitution.

#### Targeted Gene Panel

Genomic DNA isolated from blood leukocytes or bone marrow was profiled using digital droplet PCR method (Thunderbolt panel, Raindance Technologies) using the MiSeq Illumina platform. Analysis of the neoplasm-associated variants in the 49 genes was included in the targeted gene panel. UCSC hg19, NextGENe software and the GenomOncology platform were utilized for analysis along with a pathologist interpretation.

**Cohort A**

|                |      |   |   |   |       |   |   |   |   |    |    |    |    |    |    |    |    |    |    |    |    |       |  |  |  |
|----------------|------|---|---|---|-------|---|---|---|---|----|----|----|----|----|----|----|----|----|----|----|----|-------|--|--|--|
| Days           | 1    | 2 | 3 | 4 | 5     | 6 | 7 | 8 | 9 | 10 | 11 | 12 | 13 | 14 | 15 | 16 | 17 | 18 | 19 | 20 | 21 |       |  |  |  |
| Pacritinib     | D1-4 |   |   |   |       |   |   |   |   |    |    |    |    |    |    |    |    |    |    |    |    | D8-21 |  |  |  |
| Cytarabine     |      |   |   |   | D5-11 |   |   |   |   |    |    |    |    |    |    |    |    |    |    |    |    |       |  |  |  |
| Daunorubicin   |      |   |   |   | D5-7  |   |   |   |   |    |    |    |    |    |    |    |    |    |    |    |    |       |  |  |  |
| PK/PD sampling | x    |   |   |   | x     |   |   |   |   |    |    |    |    |    |    |    |    |    |    |    | x  |       |  |  |  |

| Dose level | Pacritinib (mg PO)  | Cytarabine (mg/m <sup>2</sup> q24h) | Daunorubicin (mg/m <sup>2</sup> q24h) | N |
|------------|---------------------|-------------------------------------|---------------------------------------|---|
| -2         | 200 (100 BID)       | 100                                 | 60                                    | 5 |
| -1         | 300 (200 AM, 100PM) | 100                                 | 60                                    |   |
| 1          | 400 (200 BID)       | 100                                 | 60                                    |   |

**Cohort B**

|                |       |   |   |   |       |   |   |   |   |    |    |    |    |    |    |    |    |    |    |    |    |
|----------------|-------|---|---|---|-------|---|---|---|---|----|----|----|----|----|----|----|----|----|----|----|----|
| Days           | 1     | 2 | 3 | 4 | 5     | 6 | 7 | 8 | 9 | 10 | 11 | 12 | 13 | 14 | 15 | 16 | 17 | 18 | 19 | 20 | 21 |
| Pacritinib     | D1-21 |   |   |   |       |   |   |   |   |    |    |    |    |    |    |    |    |    |    |    |    |
| Decitabine     |       |   |   |   | D5-14 |   |   |   |   |    |    |    |    |    |    |    |    |    |    |    |    |
| PK/PD sampling | x     |   |   |   | x     |   |   |   |   |    |    |    |    |    |    |    |    |    |    |    | x  |

| Dose level | Pacritinib (mg PO)  | Decitabine (mg/m <sup>2</sup> q24h) | N |
|------------|---------------------|-------------------------------------|---|
| -2         | 200 (100 BID)       | 20                                  | 6 |
| -1         | 300 (200 AM, 100PM) | 20                                  |   |
| 1          | 400 (200 BID)       | 20                                  | 2 |

**Supplementary Figure 1.** Study schema and patient enrollment. Patients were enrolled in one of two cohorts. Each drug was administered on the indicated days (D).

**Supplementary Table 1.** Binding affinities of pacritinib and midostaurin to FLT3 and mutants.

| FLT3      | Kd (nM)    |             |
|-----------|------------|-------------|
|           | Pacritinib | Midostaurin |
| Wildtype  | 1.9        | 2.6         |
| ITD       | 8.2        | 3.2         |
| D835H     | 14         | 1.3         |
| D835V     | 0.87       | 1.5         |
| D835Y     | 8.5        | 1.4         |
| ITD/D835V | 0.69       | 2.3         |
| ITD/F691L | 17         | 2.7         |

**Supplementary Table 2.** Activity of pacritinib against FLT3 mutants in a kinase assay.

| FLT3  | IC50 (nM) |
|-------|-----------|
| ITD   | 9.0       |
| D835Y | 3.1       |

**Supplementary Table 3.** Activity of pacritinib in Ba/F3 cells expressing FLT3 mutants.

| FLT3      | IC50 (nM) |
|-----------|-----------|
| GFP + IL3 | 824       |
| ITD       | 133       |
| D835H     | 97        |
| D835Y     | 300       |
| ITD/D835H | 306       |
| ITD/D835Y | 434       |
| ITDF691L  | 291       |

**Supplementary Table 4.** Activity of pacritinib and midostaurin in FLT3-ITD+ AML cell lines.

| Cell line              | IC50 (nM)  |
|------------------------|------------|
|                        | Pacritinib |
| MOLM13                 | 73         |
| MOLM13-RES (ITD/D835Y) | 173        |
| MV4-11                 | 33         |

**Supplementary Table 5.** Ex vivo activity of pacritinib in primary FLT3-ITD+ AML blast samples.

|                                   | IC50 (nM)  |             |
|-----------------------------------|------------|-------------|
|                                   | Pacritinib | Midostaurin |
| FLT3-ITD/IDH2-R140Q murine blasts | 8700       | 10700       |
| Patient 5                         | 290        | 470         |
| Patient 6                         | 152        | 460         |
| Patient 9                         | 302        | 250         |

**Supplementary Table 6.** Complete list of toxicity in all cohorts

|                                                             | Cohort A: Pacaritnib 200mg,<br>cytarabine, 100mg/m <sup>2</sup> ,<br>Daunorubicin 60mg/m <sup>2</sup> (n = 5) |         |               | Cohort B dose 1: Pacritinib 200mg,<br>Decitabine 20mg/m <sup>2</sup> (n = 6) |          |               | Cohort B Dose 2: Pacritinib 400mg,<br>Decitabine 20mg/m <sup>2</sup> (n = 2) |        |               | Overall (n = 13) |           |                |
|-------------------------------------------------------------|---------------------------------------------------------------------------------------------------------------|---------|---------------|------------------------------------------------------------------------------|----------|---------------|------------------------------------------------------------------------------|--------|---------------|------------------|-----------|----------------|
|                                                             | 1&2                                                                                                           | 3+      | Total (n = 5) | 1&2                                                                          | 3+       | Total (n = 6) | 1&2                                                                          | 3+     | Total (n = 2) | 1&2              | 3+        | Total (n = 13) |
| <b>Blood and lymphatic system disorders</b>                 |                                                                                                               |         |               |                                                                              |          |               |                                                                              |        |               |                  |           |                |
| ANEMIA                                                      | 0                                                                                                             | 3 (60)  | 3 (60)        | 1 (16.7)                                                                     | 5 (83.3) | 6 (100)       | 1 (50)                                                                       | 1 (50) | 2 (100)       | 2 (15.4)         | 9 (69.2)  | 11 (84.6)      |
| ACTIVATED PARTIAL<br>THROMBOPLASTIN TIME<br>PROLONGED       | 1 (20)                                                                                                        | 0       | 1 (20)        | 1 (16.7)                                                                     | 0        | 1 (16.7)      | 0                                                                            | 0      | 0             | 2 (15.4)         | 0         | 2 (15.4)       |
| AUTOIMMUNE HEMOLYTIC<br>REFRACTORY ANEMIA                   | 0                                                                                                             | 1 (20)  | 1 (20)        | 0                                                                            | 0        | 0             | 0                                                                            | 0      | 0             | 0                | 1 (7.7)   | 1 (7.7)        |
| FEBRILE NEUTROPENIA                                         | 0                                                                                                             | 3 (60)  | 3 (60)        | 0                                                                            | 1 (16.7) | 1 (16.7)      | 0                                                                            | 0      | 0             | 0                | 4 (30.8)  | 4 (30.8)       |
| INR INCREASED                                               | 1 (20)                                                                                                        | 0       | 1 (20)        | 0                                                                            | 0        | 0             | 0                                                                            | 0      | 0             | 1 (7.7)          | 0         | 1 (7.7)        |
| LYMPHOCYTE COUNT DECREASED                                  | 1 (20)                                                                                                        | 2 (40)  | 3 (60)        | 1 (16.7)                                                                     | 2 (33.3) | 3 (50)        | 0                                                                            | 1 (50) | 1 (50)        | 2 (15.4)         | 5 (38.5)  | 7 (53.8)       |
| LYMPHOCYTE COUNT INCREASED                                  | 0                                                                                                             | 0       | 0             | 1 (16.7)                                                                     | 0        | 1 (16.7)      | 0                                                                            | 0      | 0             | 1 (7.7)          | 0         | 1 (7.7)        |
| NEUTROPHIL COUNT DECREASED                                  | 0                                                                                                             | 2 (40)  | 2 (40)        | 0                                                                            | 3 (50)   | 3 (50)        | 0                                                                            | 1 (50) | 1 (50)        | 0                | 6 (46.2)  | 6 (46.2)       |
| PLATELET COUNT DECREASED                                    | 0                                                                                                             | 5 (100) | 5 (100)       | 0                                                                            | 5 (83.3) | 5 (83.3)      | 0                                                                            | 1 (50) | 1 (50)        | 0                | 11 (84.6) | 11 (84.6)      |
| WHITE BLOOD CELL DECREASED                                  | 0                                                                                                             | 4 (80)  | 4 (80)        | 0                                                                            | 3 (50)   | 3 (50)        | 0                                                                            | 1 (50) | 1 (50)        | 0                | 8 (61.5)  | 8 (61.5)       |
| <b>Cardiac disorders</b>                                    |                                                                                                               |         |               |                                                                              |          |               |                                                                              |        |               |                  |           |                |
| ASYSTOLE                                                    | 0                                                                                                             | 0       | 0             | 0                                                                            | 1 (16.7) | 1 (16.7)      | 0                                                                            | 0      | 0             | 0                | 1 (7.7)   | 1 (7.7)        |
| ELECTROCARDIOGRAM QT<br>CORRECTED INTERVAL<br>PROLONGED     | 4 (80)                                                                                                        | 0       | 4 (80)        | 1 (16.7)                                                                     | 1 (16.7) | 2 (33.3)      | 0                                                                            | 0      | 0             | 5 (38.5)         | 1 (7.7)   | 6 (46.2)       |
| PERICARDIAL EFFUSION                                        | 0                                                                                                             | 0       | 0             | 0                                                                            | 1 (16.7) | 1 (16.7)      | 0                                                                            | 0      | 0             | 0                | 1 (7.7)   | 1 (7.7)        |
| SINUS TACHYCARDIA                                           | 0                                                                                                             | 0       | 0             | 0                                                                            | 0        | 0             | 1 (50)                                                                       | 0      | 1 (50)        | 1 (7.7)          | 0         | 1 (7.7)        |
| <b>Gastrointestinal disorders</b>                           |                                                                                                               |         |               |                                                                              |          |               |                                                                              |        |               |                  |           |                |
| ALANINE AMINOTRANSFERASE<br>INCREASED                       | 0                                                                                                             | 0       | 0             | 0                                                                            | 1 (16.7) | 1 (16.7)      | 0                                                                            | 0      | 0             | 0                | 1 (7.7)   | 1 (7.7)        |
| BLOOD BILIRUBIN INCREASED                                   | 0                                                                                                             | 0       | 0             | 0                                                                            | 0        | 0             | 1 (50)                                                                       | 0      | 1 (50)        | 1 (7.7)          | 0         | 1 (7.7)        |
| CONSTIPATION                                                | 0                                                                                                             | 0       | 0             | 1 (16.7)                                                                     | 0        | 1 (16.7)      | 1 (50)                                                                       | 0      | 1 (50)        | 2 (15.4)         | 0         | 2 (15.4)       |
| DIARRHEA                                                    | 3 (60)                                                                                                        | 0       | 3 (60)        | 1 (16.7)                                                                     | 0        | 1 (16.7)      | 0                                                                            | 0      | 0             | 4 (30.8)         | 0         | 4 (30.8)       |
| GUM BLEEDING                                                | 0                                                                                                             | 0       | 0             | 0                                                                            | 0        | 0             | 1 (50)                                                                       | 0      | 1 (50)        | 1 (7.7)          | 0         | 1 (7.7)        |
| MUCOSITIS ORAL                                              | 2 (40)                                                                                                        | 0       | 2 (40)        | 1 (16.7)                                                                     | 1 (16.7) | 2 (33.3)      | 0                                                                            | 0      | 0             | 3 (23.1)         | 1 (7.7)   | 4 (30.8)       |
| NAUSEA                                                      | 3 (60)                                                                                                        | 0       | 3 (60)        | 3 (50)                                                                       | 0        | 3 (50)        | 0                                                                            | 1 (50) | 1 (50)        | 6 (46.2)         | 1 (7.7)   | 7 (53.8)       |
| ORAL HEMORRHAGE                                             | 0                                                                                                             | 0       | 0             | 1 (16.7)                                                                     | 0        | 1 (16.7)      | 0                                                                            | 0      | 0             | 1 (7.7)          | 0         | 1 (7.7)        |
| RECTAL PAIN                                                 | 0                                                                                                             | 0       | 0             | 1 (16.7)                                                                     | 0        | 1 (16.7)      | 0                                                                            | 0      | 0             | 1 (7.7)          | 0         | 1 (7.7)        |
| VOMITING                                                    | 0                                                                                                             | 0       | 0             | 2 (33.3)                                                                     | 0        | 2 (33.3)      | 1 (50)                                                                       | 0      | 1 (50)        | 3 (23.1)         | 0         | 3 (23.1)       |
| <b>General disorders and administration site conditions</b> |                                                                                                               |         |               |                                                                              |          |               |                                                                              |        |               |                  |           |                |
| CHILLS                                                      | 0                                                                                                             | 0       | 0             | 1 (16.7)                                                                     | 0        | 1 (16.7)      | 0                                                                            | 0      | 0             | 1 (7.7)          | 0         | 1 (7.7)        |
| EDEMA LIMBS                                                 | 1 (20)                                                                                                        | 0       | 1 (20)        | 1 (16.7)                                                                     | 0        | 1 (16.7)      | 0                                                                            | 0      | 0             | 2 (15.4)         | 0         | 2 (15.4)       |
| FATIGUE                                                     | 3 (60)                                                                                                        | 0       | 3 (60)        | 2 (33.3)                                                                     | 0        | 2 (33.3)      | 0                                                                            | 0      | 0             | 5 (38.5)         | 0         | 5 (38.5)       |
| NIGHT SWEATS                                                | 1 (20)                                                                                                        | 0       | 1 (20)        | 0                                                                            | 0        | 0             | 0                                                                            | 0      | 0             | 1 (7.7)          | 0         | 1 (7.7)        |
| <b>Infections and infestations</b>                          |                                                                                                               |         |               |                                                                              |          |               |                                                                              |        |               |                  |           |                |
| CATHETER RELATED INFECTION                                  | 0                                                                                                             | 0       | 0             | 1 (16.7)                                                                     | 0        | 1 (16.7)      | 0                                                                            | 0      | 0             | 1 (7.7)          | 0         | 1 (7.7)        |
| GRAM NEGATIVE BACTERIA                                      | 0                                                                                                             | 0       | 0             | 1 (16.7)                                                                     | 0        | 1 (16.7)      | 0                                                                            | 0      | 0             | 1 (7.7)          | 0         | 1 (7.7)        |
| LUNG INFECTION                                              | 0                                                                                                             | 1 (20)  | 1 (20)        | 0                                                                            | 1 (16.7) | 1 (16.7)      | 0                                                                            | 0      | 0             | 0                | 2 (15.4)  | 2 (15.4)       |
| PAPULOPUSTULAR RASH                                         | 1 (20)                                                                                                        | 0       | 1 (20)        | 0                                                                            | 0        | 0             | 0                                                                            | 0      | 0             | 1 (7.7)          | 0         | 1 (7.7)        |
| SEPSIS                                                      | 0                                                                                                             | 1 (20)  | 1 (20)        | 0                                                                            | 0        | 0             | 0                                                                            | 0      | 0             | 0                | 1 (7.7)   | 1 (7.7)        |
| UPPER RESPIRATORY INFECTION                                 | 0                                                                                                             | 0       | 0             | 0                                                                            | 1 (16.7) | 1 (16.7)      | 0                                                                            | 0      | 0             | 0                | 1 (7.7)   | 1 (7.7)        |

|                                                        |        |        |        |          |          |          |        |        |        |          |          |          |
|--------------------------------------------------------|--------|--------|--------|----------|----------|----------|--------|--------|--------|----------|----------|----------|
| URINARY TRACT INFECTION                                | 0      | 0      | 0      | 1 (16.7) | 0        | 1 (16.7) | 0      | 0      | 0      | 1 (7.7)  | 0        | 1 (7.7)  |
| <b>Injury, poisoning and procedural complications</b>  |        |        |        |          |          |          |        |        |        |          |          |          |
| FALL                                                   | 0      | 0      | 0      | 0        | 0        | 0        | 1 (50) | 0      | 1 (50) | 1 (7.7)  | 0        | 1 (7.7)  |
| <b>Metabolism and nutrition disorders</b>              |        |        |        |          |          |          |        |        |        |          |          |          |
| ANOREXIA                                               | 0      | 0      | 0      | 2 (33.3) | 0        | 2 (33.3) | 0      | 0      | 0      | 2 (15.4) | 0        | 2 (15.4) |
| HYPERGLYCEMIA                                          | 1 (20) | 0      | 1 (20) | 1 (16.7) | 0        | 1 (16.7) | 1 (50) | 0      | 1 (50) | 3 (23.1) | 0        | 3 (23.1) |
| HYPERMAGNESEMIA                                        | 1 (20) | 0      | 1 (20) | 0        | 0        | 0        | 0      | 0      | 0      | 1 (7.7)  | 0        | 1 (7.7)  |
| HYPERURICEMIA                                          | 0      | 0      | 0      | 0        | 0        | 0        | 1 (50) | 0      | 1 (50) | 1 (7.7)  | 0        | 1 (7.7)  |
| HYPOALBUMINEMIA                                        | 2 (40) | 0      | 2 (40) | 1 (16.7) | 0        | 1 (16.7) | 0      | 0      | 0      | 3 (23.1) | 0        | 3 (23.1) |
| HYPOCALCEMIA                                           | 1 (20) | 0      | 1 (20) | 0        | 0        | 0        | 0      | 0      | 0      | 1 (7.7)  | 0        | 1 (7.7)  |
| HYPOKALEMIA                                            | 1 (20) | 0      | 1 (20) | 2 (33.3) | 0        | 2 (33.3) | 0      | 1 (50) | 1 (50) | 3 (23.1) | 1 (7.7)  | 4 (30.8) |
| HYPONATREMIA                                           | 0      | 0      | 0      | 1 (16.7) | 0        | 1 (16.7) | 0      | 0      | 0      | 1 (7.7)  | 0        | 1 (7.7)  |
| HYPOPHOSPHATEMIA                                       | 0      | 1 (20) | 1 (20) | 0        | 1 (16.7) | 1 (16.7) | 0      | 0      | 0      | 0        | 2 (15.4) | 2 (15.4) |
| <b>Musculoskeletal and connective tissue disorders</b> |        |        |        |          |          |          |        |        |        |          |          |          |
| SHOULDER PAIN (LEFT)                                   | 1 (20) | 0      | 1 (20) | 0        | 0        | 0        | 0      | 0      | 0      | 1 (7.7)  | 0        | 1 (7.7)  |
| PAIN IN EXTREMITY                                      | 1 (20) | 0      | 1 (20) | 0        | 0        | 0        | 0      | 0      | 0      | 1 (7.7)  | 0        | 1 (7.7)  |
| <b>Nervous system disorders</b>                        |        |        |        |          |          |          |        |        |        |          |          |          |
| AKATHISIA                                              | 0      | 0      | 0      | 0        | 0        | 0        | 1 (50) | 0      | 1 (50) | 1 (7.7)  | 0        | 1 (7.7)  |
| DYSGEUSIA                                              | 0      | 0      | 0      | 1 (16.7) | 0        | 1 (16.7) | 0      | 0      | 0      | 1 (7.7)  | 0        | 1 (7.7)  |
| FACIAL NERVE DISORDER                                  | 0      | 0      | 0      | 1 (16.7) | 0        | 1 (16.7) | 0      | 0      | 0      | 1 (7.7)  | 0        | 1 (7.7)  |
| HEADACHE                                               | 0      | 0      | 0      | 1 (16.7) | 0        | 1 (16.7) | 0      | 0      | 0      | 1 (7.7)  | 0        | 1 (7.7)  |
| PARESTHESIA                                            | 1 (20) | 0      | 1 (20) | 0        | 0        | 0        | 0      | 0      | 0      | 1 (7.7)  | 0        | 1 (7.7)  |
| PERIPHERAL MOTOR NEUROPATHY                            | 0      | 0      | 0      | 1 (16.7) | 0        | 1 (16.7) | 0      | 0      | 0      | 1 (7.7)  | 0        | 1 (7.7)  |
| TREMOR                                                 | 1 (20) | 0      | 1 (20) | 0        | 0        | 0        | 0      | 0      | 0      | 1 (7.7)  | 0        | 1 (7.7)  |
| <b>Psychiatric disorders</b>                           |        |        |        |          |          |          |        |        |        |          |          |          |
| INSOMNIA                                               | 0      | 0      | 0      | 0        | 0        | 0        | 1 (50) | 0      | 1 (50) | 1 (7.7)  | 0        | 1 (7.7)  |
| <b>Renal and urinary disorders</b>                     |        |        |        |          |          |          |        |        |        |          |          |          |
| URINARY FREQUENCY                                      | 0      | 0      | 0      | 1 (16.7) | 0        | 1 (16.7) | 0      | 0      | 0      | 1 (7.7)  | 0        | 1 (7.7)  |
| URINARY TRACT OBSTRUCTION                              | 0      | 0      | 0      | 0        | 1 (16.7) | 1 (16.7) | 0      | 0      | 0      | 0        | 1 (7.7)  | 1 (7.7)  |
| URINARY URGENCY                                        | 0      | 0      | 0      | 1 (16.7) | 0        | 1 (16.7) | 0      | 0      | 0      | 1 (7.7)  | 0        | 1 (7.7)  |
| <b>Respiratory, thoracic and mediastinal disorders</b> |        |        |        |          |          |          |        |        |        |          |          |          |
| COUGH                                                  | 0      | 0      | 0      | 1 (16.7) | 0        | 1 (16.7) | 0      | 0      | 0      | 1 (7.7)  | 0        | 1 (7.7)  |
| DYSPNEA                                                | 1 (20) | 0      | 1 (20) | 0        | 0        | 0        | 1 (50) | 0      | 1 (50) | 2 (15.4) | 0        | 2 (15.4) |
| EPISTAXIS                                              | 0      | 0      | 0      | 0        | 0        | 0        | 1 (50) | 0      | 1 (50) | 1 (7.7)  | 0        | 1 (7.7)  |
| HYPOXIA                                                | 0      | 2 (40) | 2 (40) | 0        | 0        | 0        | 0      | 0      | 0      | 0        | 2 (15.4) | 2 (15.4) |
| PLEURAL EFFUSION                                       | 1 (20) | 0      | 1 (20) | 1 (16.7) | 0        | 1 (16.7) | 0      | 0      | 0      | 2 (15.4) | 0        | 2 (15.4) |
| RESPIRATORY FAILURE                                    | 0      | 2 (40) | 2 (40) | 0        | 1 (16.7) | 1 (16.7) | 0      | 0      | 0      | 0        | 3 (23.1) | 3 (23.1) |
| SORE THROAT                                            | 0      | 0      | 0      | 1 (16.7) | 0        | 1 (16.7) | 0      | 0      | 0      | 1 (7.7)  | 0        | 1 (7.7)  |
| <b>Skin and subcutaneous tissue disorders</b>          |        |        |        |          |          |          |        |        |        |          |          |          |
| BULLOUS DERMATITIS                                     | 1 (20) | 0      | 1 (20) | 0        | 0        | 0        | 0      | 0      | 0      | 1 (7.7)  | 0        | 1 (7.7)  |
| PRURITUS                                               | 4 (80) | 0      | 4 (80) | 0        | 0        | 0        | 0      | 0      | 0      | 4 (30.8) | 0        | 4 (30.8) |
| RASH ACNEIFORM                                         | 1 (20) | 0      | 1 (20) | 0        | 0        | 0        | 0      | 0      | 0      | 1 (7.7)  | 0        | 1 (7.7)  |
| RASH MACULO-PAPULAR                                    | 1 (20) | 1 (20) | 2 (40) | 0        | 0        | 0        | 0      | 0      | 0      | 1 (7.7)  | 1 (7.7)  | 2 (15.4) |
| RASH                                                   | 2 (40) | 0      | 2 (40) | 1 (16.7) | 0        | 1 (16.7) | 0      | 0      | 0      | 3 (23.1) | 0        | 3 (23.1) |
| <b>Vascular disorders</b>                              |        |        |        |          |          |          |        |        |        |          |          |          |
| HYPERTENSION                                           | 1 (20) | 1 (20) | 2 (40) | 0        | 0        | 0        | 1 (50) | 0      | 1 (50) | 2 (15.4) | 1 (7.7)  | 3 (23.1) |
| HYPOTENSION                                            | 1 (20) | 0      | 1 (20) | 0        | 0        | 0        | 0      | 0      | 0      | 1 (7.7)  | 0        | 1 (7.7)  |

**Supplementary Table 7.** List of mutations in *FLT3* exons 17 and 20 by deep amplicon sequencing.

| Pt | Time point | <i>FLT3</i> Exon 17 |                     |                       |                         |                           | <i>FLT3</i> Exon 20 |                   |                   |                   |                   |            |           |           |           |
|----|------------|---------------------|---------------------|-----------------------|-------------------------|---------------------------|---------------------|-------------------|-------------------|-------------------|-------------------|------------|-----------|-----------|-----------|
|    |            | F691 WT (TTT)       | F691L (TTT) C (F>L) | F691L (TTT) G/A (F>L) | F691L (TTT) C (F>L) (%) | F691L (TTT) G/A (F>L) (%) | D835 WT (GAT)       | D835Y (GAT) T D>Y | D835H (GAT) C D>H | D835N (GAT) A D>N | D835V (GAT) T D>V | D835Y (%)  | D835H (%) | D835N (%) | D835V (%) |
| 1  | C1D5       | 469569              | 51                  | 73                    | 0.011                   | 0.015                     | 806999              | 148               | 59                | 129               | 159               | 0.02       | 0.01      | 0.02      | 0.02      |
| 2  | Screen     | 485142              | 51                  | 61                    | 0.011                   | 0.012                     | 730394              | 135               | 41                | 129               | 136               | 0.02       | 0.01      | 0.02      | 0.02      |
| 3  | Screen     | 563490              | 94                  | 112                   | 0.017                   | 0.020                     | 770481              | 219               | 76                | 166               | 220               | 0.03       | 0.01      | 0.02      | 0.03      |
| 4  | C1D5       | 560214              | 51                  | 68                    | 0.009                   | 0.012                     | 798014              | 150               | 44                | 96                | 120               | 0.02       | 0.01      | 0.01      | 0.02      |
| 5  | Screen     | 493229              | 44                  | 76                    | 0.009                   | 0.015                     | 801057              | 283               | 41                | 101               | 136               | 0.04       | 0.01      | 0.01      | 0.02      |
| 6  | Screen     | 578245              | 69                  | 97                    | 0.012                   | 0.017                     | 782173              | 169               | 51                | 122               | 152               | 0.02       | 0.01      | 0.02      | 0.02      |
| 7  | Screen     | 557796              | 56                  | 95                    | 0.010                   | 0.017                     | 786839              | 175               | 59                | 118               | 155               | 0.02       | 0.01      | 0.01      | 0.02      |
| 8  | Screen     | 550743              | 69                  | 86                    | 0.013                   | 0.015                     | 722458              | 173               | 67                | 421               | 154               | 0.02       | 0.01      | 0.06      | 0.02      |
| 9  | Screen     | 511748              | 89                  | 167                   | 0.017                   | 0.032                     | 777473              | 17952             | 104               | 208               | 247               | <b>2.3</b> | 0.01      | 0.03      | 0.03      |
| 10 | Screen     | 524412              | 42                  | 70                    | 0.008                   | 0.013                     | 739752              | 148               | 44                | 100               | 139               | 0.02       | 0.01      | 0.01      | 0.02      |
| 11 | Screen     | 510672              | 95                  | 116                   | 0.019                   | 0.023                     | 738506              | 272               | 108               | 166               | 237               | 0.04       | 0.01      | 0.02      | 0.03      |
| 12 | Screen     | 555086              | 74                  | 115                   | 0.013                   | 0.021                     | 759971              | 293               | 112               | 230               | 237               | 0.04       | 0.01      | 0.03      | 0.03      |
| 13 | Screen     | 588343              | 88                  | 154                   | 0.015                   | 0.026                     | 717111              | 276               | 102               | 234               | 287               | 0.04       | 0.01      | 0.03      | 0.04      |

Data are number of reads at each position, unless indicated otherwise.

**Supplementary Table 8.** List of other mutations from a targeted gene panel and percentage blast change from baseline to day 5 of course 1 (C1D5).

| Pt | Other mutations (VAF)                            | % Blast (PB) |      | % Blast (BM) |      |
|----|--------------------------------------------------|--------------|------|--------------|------|
|    |                                                  | Baseline     | C1D5 | Baseline     | C1D5 |
| 1  |                                                  | 0            | 9    | 2            | NA   |
| 2  | RUNX1 (0.25), TET2 (0.29)                        | 17           | NA   | 35           | NA   |
| 3  | NPM1 (0.23), WT1 (0.26), DNMT3A (0.26)           | 32.2         | 6.8  | 45           | NA   |
| 4  | WT1 (0.32), TET2 (0.48)                          | 0            | 10.4 | NA           | NA   |
| 5  | NPM1 (0.43), IDH2 (0.44)                         | 39           | 30   | 31           | NA   |
| 6  | ASXL1 (0.46)                                     | 52           | 71   | 80           | NA   |
| 7  | NPM1 (0.40), TET2 (T965fs, 0.416; Y1245fs, 0.45) | 69           | 65   | NA           | NA   |
| 8  | IDH2 (0.50)                                      | 35.9         | 29.3 | 65           | NA   |
| 9  | NPM1 (0.41)                                      | 49.7         | 15   | 58           | NA   |
| 10 |                                                  | 88           | 20   | 88           | NA   |
| 11 | NPM1 (0.43), DNMT3A (0.46)                       | 10           | 0    | NA           | NA   |
| 12 |                                                  | 0            | NA   | NA           | NA   |
| 13 | CBL (0.34)                                       | 14           | NA   | 19.7         | NA   |

Abbreviations: VAF, variant allele fraction; PB, peripheral blood; BM, bone marrow.
